# Supplementary material for: Organotemplate-free synthesis of hollow Beta zeolite supported Pt-based catalysts for low-temperature ethanol steam reforming
Source: Royal Society of Chemistry journal article supplement (doi:10.1039/c6cy01354f), 2016-01-01
Supplement: c6cy01354f1.pdf [file c6cy01354f1.pdf]

## Supplementary material

### Organotemplate-free synthesis of hollow Beta zeolite supported Pt-based catalysts for the low-temperature ethanol steam reforming

Ziliang Zheng, Chen Sun, Rong Dai, Shiyao Wang, Xu Wu, Xia An, Xianmei Xie\*

College of Chemistry and Chemical Engineering, Taiyuan University of Technology, Taiyuan 030024, China

\*Corresponding author: E-mail addresses: xxmsxty@sina.com.

## 2. Experimental section

### 2.1 Catalyst preparation

The carbon spheres were fabricated according to literature indicated.<sup>1</sup> Then, platinum modified carbon spheres were prepared by impregnation with an aqueous solution of  $\text{H}_2\text{PtCl}_6 \cdot 6\text{H}_2\text{O}$  (Aldrich, 99.99%) to obtain the desired loading (0.5, 1 and 2 wt.%). This solution was stirred for 12 h and dried at 100 °C overnight. Afterwards, a LbL technique was performed with nano-Beta seeds of 50 nm, which was synthesized from a mixture with the molar composition of  $8\text{TEAOH}:40\text{SiO}_2:\text{Al}_2\text{O}_3:480\text{H}_2\text{O}$  at 140 °C for 72 h. The solid products were then treated through a two-step hydrothermal approach with the composition of  $\text{Al}_2\text{O}_3:\text{SiO}_2:\text{H}_2\text{O} = 1:120:650$ . Typically, sodium aluminate (50%  $\text{Al}_2\text{O}_3$  and 38%  $\text{Na}_2\text{O}$ , Kermel) was dissolved in distilled water, then tetraethylorthosilicate (TEOS, Aldrich) was added to the above solution. After stirring the mixture for 2 h, an appropriate amount of modified carbon spheres (related to  $\text{C}/\text{SiO}_2 = 30$  wt.%) was added. The mixture was then transferred into a teflon-lined autoclave and crystallized at 140 °C for 5 days. The resulting product ( $x\text{Pt-C@HBS}$ ) was separated by centrifugation and washed with distilled water for three times. To remove the carbon spheres, the samples were calcined in air at 500 °C for 10 h with a rate of 1 °C/min, the hollow zeolite samples are denoted as  $x\text{Pt@HBS}$ , where  $x$  represented

the nominal Pt loading (wt.%).

## 2.2 Catalyst characterization

The crystalline structure of catalysts was analyzed by X-ray diffraction (XRD) spectra, with a Rigaku D/max-2500 diffractometer equipped (40 kV, 100 mA), provided with a Cu cathode, with a scanning rate 1 °/min.

BET surface areas were measured at -196 °C with a Micromeritics ASAP-2020 instrument. Before the N<sub>2</sub> adsorption, all of the catalysts were outgassed at 300 °C for 24 h. The surface area was calculated by the Brunauer-Emmett-Teller (BET) method, and the micropore surface area and pore volume were calculated using the t-plot approach.

X-ray photoelectron spectroscopy (XPS) was performed with a V.G. Scientific ESCALAB250 using Al K $\alpha$  radiation (1486.6 eV, 150 W). The recorded spectra was fitted by a least square procedure to a product of Gaussian-Lorentzian function.

Crystal morphology and size of samples were observed with a scanning electron microscope (SEM, SU-1500, Hitachi). Transmission electron microscopy (TEM) was used to study the crystal structure of the catalysts (JEM 1011, operating at 100 kV).

The elemental analysis of samples was carried out on a Perkin Elmer OPTIMA 2000DV ICP Optical Emission Spectrometer.

## 2.3 Catalytic performance testing

Ethanol steam reforming was performed in a fixed-bed micro-reactor at the atmospheric pressure. 0.5 g of catalyst (40-60 mesh) diluted with 4 times of inactive SiO<sub>2</sub> was settled between two quartz wool layers in the reactor. Before reaction, the fresh catalysts were reduced in situ at 300 °C for 2 h under a H<sub>2</sub> flow (50 ml/min) and then purged under N<sub>2</sub> at the same temperature for 30 min.

A liquid mixture of C<sub>2</sub>H<sub>5</sub>OH/H<sub>2</sub>O molar ratio 1:6 (0.07 mL/min, WHSV: 7.35 h<sup>-1</sup>) was fed by a micro-liquid pump to vaporized at 150 °C and carried into the reactor using N<sub>2</sub> as carrier. The effluent of the reactor was analyzed on-line by a GC 950 gas chromatograph using two TDX-01 packed columns, a TCD and a FID. For the separation and quantification of the liquid products, another gas chromatography (GC-9890B) with a Porapak Q capillary column connected to a FID detector was applied. The results were expressed through the conversion of ethanol ( $X_{\text{EtOH}}$ ), and the selectivity ( $S_i$ ) towards the products ( $i = \text{H}_2, \text{CO}_2, \text{CO}, \text{CH}_4$  or  $\text{CH}_3\text{CHO}$ ) (Eqs.(1-2)):

$$X_{\text{EtOH}} (\%) = \frac{(\text{moles EtOH}_{\text{in}} - \text{moles EtOH}_{\text{out}})}{\text{moles EtOH}_{\text{in}}} \times 100 \quad (1)$$

$$S_i (\%) = \frac{\text{moles } P_i}{\sum_{i=1}^n \text{moles } P_i} \times 100 \quad (2)$$

where  $P_i$  is the molar amount of different components in the products.

## References

- [1] X. Sun, Y. Li, Angew. Chem.-Int. Ed. 43(2004) 3827-3831.
